# Supplementary material
Source: MDPI journal article supplement (https://www.mdpi.com/2075-163X/12/7/876)
Supplement: s1 [file s1]

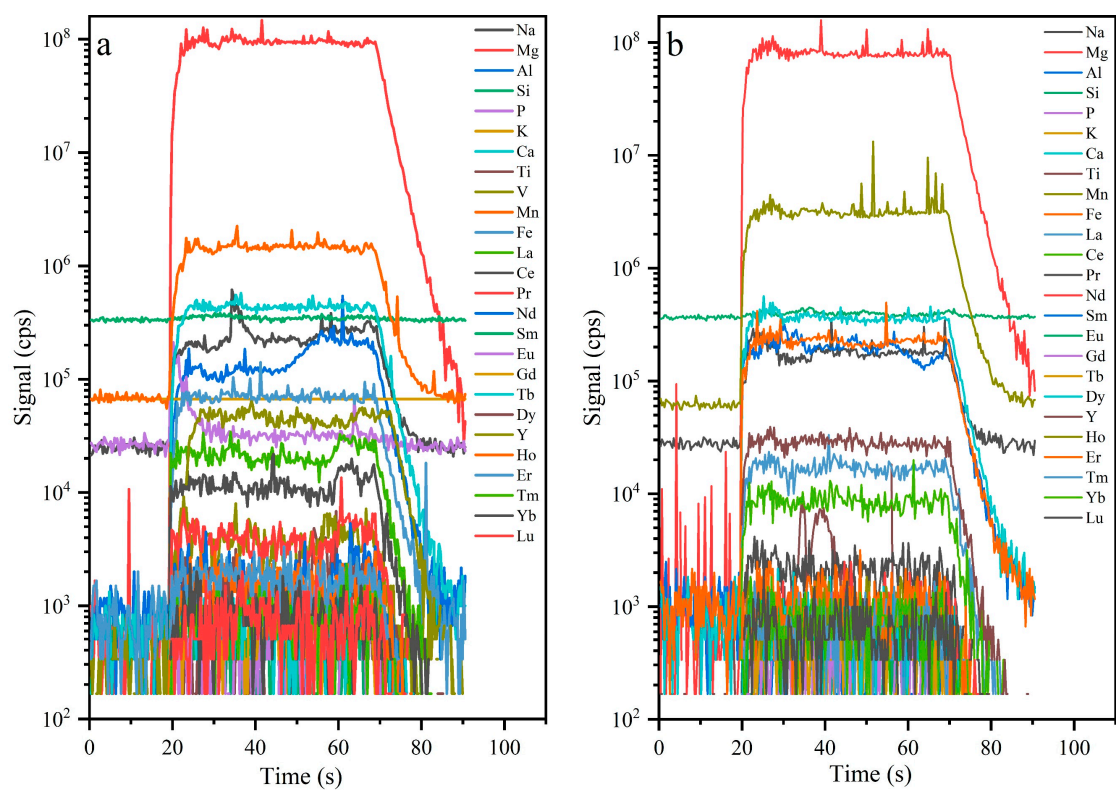

**Figure S1.** The laser signal line graphs of representative samples. **(a)** The laser signal line graph of dolomite cement-4 from Table 3. **(b)** The laser signal line graph of dolomite-2 from Table 3.
