# Supplementary material
Source: MDPI journal article supplement (https://www.mdpi.com/2075-163X/12/7/876)
Supplement: s1 [file s1 › Supplementary Table S1.xlsx]

## Sheet: Table S1
Table S1. The concentrations of major elements (%), trace elements (ppm), and REY (ppm) of the Zhijin samples.
	Elements	P2O5	Al2O3	Th	Sc	Zr	La	Ce	Pr	Nd	Sm	Eu	Gd	Tb	Dy	Y	Ho	Er	Tm	Yb	Lu	REY	Ce/Ce*	DyN/SmN	Y/Ho
	units	%	%	μg/g	μg/g	μg/g	μg/g	μg/g	μg/g	μg/g	μg/g	μg/g	μg/g	μg/g	μg/g	μg/g	μg/g	μg/g	μg/g	μg/g	μg/g	μg/g
	detection limit	0.01	0.01	0.01	0.1	2	0.1	0.1	0.03	0.1	0.03	0.03	0.05	0.01	0.05	0.1	0.01	0.03	0.01	0.03	0.01
NO.	Samples
MTC-1	Phosphorite	29	2.83	13.25	7.1	69	341	269	67.5	296	56.5	11.55	66.5	8.69	52	475	10.55	27.5	3.18	15.2	1.87	1702.04	0.409093	1.09145	45.0237
MTC-2	Phosphorus dolomite	10.3	1.69	3.84	5.3	25	113.5	90	22.2	96.4	18.95	3.94	21.4	2.88	16.9	163	3.51	9.1	1.08	5.42	0.7	568.98	0.413682	1.05761	46.4387
MTC-3	Phosphorite	26.3	2.9	10.1	8.8	68	279	220	51.7	217	41	8.54	48	6.22	38.4	378	7.79	20.7	2.4	11.7	1.47	1331.92	0.422644	1.11069	48.5237
MTC-4	P-bearing dolomite	9.15	1.24	2.42	3.6	17	92.4	70.1	15.53	66.9	12.4	2.85	14.6	1.99	12.5	125.5	2.65	7.24	0.85	4.4	0.56	430.47	0.426968	1.19546	47.3585
MTC-5	Phosphorus dolomite	13	1.06	4.77	3.3	19	200	153.5	39.2	168.5	31.3	6.28	36.4	4.82	29.4	288	5.85	15.6	1.77	8.3	0.94	989.86	0.39999	1.11391	49.2308
MTC-6	P-bearing dolomite	6.21	0.55	2.36	1.9	9	104.5	82.2	19.5	84.1	16.5	3.24	17.45	2.44	14.85	145.5	3.02	8.11	0.97	5.02	0.64	508.04	0.420141	1.06731	48.1788
MTC-7	Phosphorite	20.3	1.26	5.4	4.7	35	267	199	50.4	216	40.1	8.54	47.7	6.42	39.4	424	8.35	22.2	2.5	11.8	1.39	1344.8	0.395805	1.1652	50.7784
MTC-8	P-bearing dolomite	3.97	0.59	1.29	3.2	7	60.9	44.1	11.2	48.1	9.02	1.88	10.85	1.45	8.87	97.9	1.91	5.33	0.65	3.45	0.46	306.07	0.389601	1.16618	51.2565
MTC-9	Phosphorus dolomite	15.25	0.95	3.53	2.4	21	190	136.5	36.4	158.8	29.5	6.18	36.2	4.99	29.4	320	6.49	16.25	1.85	8.81	1.04	982.41	0.378708	1.18188	49.3066
MTC-10	P-bearing dolomite	6.67	0.49	1.46	2.1	9	83.3	59.9	15.5	68.3	12.75	2.71	15.2	2.08	12.6	138	2.76	7.14	0.91	4.55	0.62	426.32	0.384625	1.17195	50
MTC-11	Phosphorite	25.9	5.85	9.63	8	85	343	254	66.3	290	54.2	11.55	64	8.65	51.1	518	11.25	27.9	3.18	14.35	1.86	1719.34	0.388623	1.11807	46.0444
MTC-12	Phosphorite	24	4.37	6.81	8.3	61	263	189.8	47.2	203	37.5	7.71	45	6.06	36.4	420	8.03	20	2.38	10.73	1.39	1298.2	0.393049	1.15111	52.3039
MTC-13	P-bearing dolomite	2.06	0.69	0.81	1.3	10	28	19.5	4.74	19.4	3.78	0.76	4.63	0.63	4.02	45.4	0.91	2.7	0.38	2.16	0.3	137.31	0.39054	1.26119	49.8901
MTC-14	Phosphorite	27.5	4.52	8.26	7.3	83	350	239	59.6	257	46.8	9.94	57	7.59	45.5	518	10.2	26.3	2.94	13.8	1.83	1645.5	0.381803	1.15296	50.7843
MTC-15	P-bearing dolomite	2.16	1.1	0.92	1.8	9	32	21.8	5.34	23.4	4.22	0.87	4.91	0.73	4.38	52.5	1	2.9	0.4	2.23	0.34	157.02	0.384778	1.23086	52.5
MTC-16	Phosphorite	19.05	3.5	5.85	5.4	57	246	165	42	182.3	33.5	6.91	40.7	5.42	32.9	429	7.25	19.1	2.19	10.23	1.33	1223.83	0.374534	1.16466	59.1724
MTC-17	P-bearing dolomite	1.88	0.61	0.76	1	9	32.8	22.3	5.15	22.1	3.92	0.8	4.79	0.7	4.35	58.7	1.06	3.14	0.43	2.38	0.35	162.97	0.39588	1.31598	55.3774
MTC-18	Phosphorus dolomite	10.4	4.21	4.59	5.4	61	132.5	84.9	22.9	99.8	18.4	3.81	21.5	2.87	17.15	195	3.75	9.73	1.18	5.73	0.75	619.97	0.355616	1.10533	52
MTC-19	P-bearing dolomite	5.76	1.2	1.62	1.8	16	71.6	45.1	12.5	54.3	9.87	2.06	11.9	1.59	9.53	116.5	2.1	5.88	0.69	3.65	0.51	347.78	0.347828	1.14505	55.4762
MTC-20	Phosphorite	27.5	2.7	7.59	5.7	67	352	224	63.9	277	49.5	10.7	59.4	7.76	45.3	495	9.85	25	2.94	13.8	1.77	1637.92	0.344608	1.08528	50.2538
MTC-21	P-bearing dolomite	5.49	1.35	1.41	2.6	14	69	43.1	12.15	52.1	9.51	2.01	11.7	1.55	9.04	106.5	2.05	5.23	0.63	3.27	0.42	328.26	0.34345	1.12729	51.9512
MTC-22	Phosphorite	22	1.66	4.16	3.6	32	256	156.5	45.9	202	36	7.83	43.3	5.67	33.7	372	7.32	18.4	2.14	9.88	1.27	1197.91	0.333109	1.11013	50.8197
MTC-23	P-bearing dolomite	4.6	0.35	1.03	1.5	7	61.2	36.7	10.25	43.7	7.96	1.78	10	1.35	8.26	97.2	1.9	4.93	0.61	3.13	0.4	289.37	0.338086	1.23059	51.1579
MTC-24	Phosphorite	29.7	0.5	3.83	2.6	19	317	187.5	54.7	240	42.4	8.86	50.4	6.68	39.3	480	8.7	21.6	2.58	12.15	1.57	1473.44	0.328531	1.09919	55.1724
MTC-25	P-bearing dolomite	4.57	0.22	0.84	1.3	5	54	32.1	9.05	38.7	7.04	1.57	8.47	1.1	6.93	79.7	1.52	4.01	0.48	2.6	0.33	247.6	0.335029	1.16737	52.4342
MTC-26	Phosphorite	36.4	0.24	4.33	1.6	25	386	223	60.1	250	45.5	10.7	56.8	7.77	48.2	588	10.4	26.6	3.14	14.45	1.9	1732.56	0.33781	1.25627	56.5385
MTC-27	Phosphorus dolomite	13.8	0.18	1.6	4	8	144.5	82.8	22.4	95.8	17.38	4.11	22.1	2.97	18.45	232	4.07	10.55	1.21	5.85	0.75	664.94	0.335793	1.25891	57.0025
MTC-28	Phosphorite	36.1	0.28	4.12	1.8	22	377	215	58.9	250	43.7	10.35	55.6	7.53	46.6	565	10.2	26.4	3.03	14.25	1.96	1685.52	0.332896	1.2646	55.3922
MTC-29	Phosphorus dolomite	12.1	0.26	1.37	3	8	123.5	69.7	19.53	83.9	15.13	3.57	18.85	2.58	16.3	196.5	3.51	9.46	1.13	5.51	0.78	569.95	0.327452	1.2776	55.9829
MTC-30	Phosphorite	36.7	0.17	4.5	1.5	21	437	249	69.5	297	52.1	11.9	65.1	8.73	53.4	632	11.35	30	3.55	16.55	2.16	1939.34	0.329659	1.21549	55.6828
MTC-31	P-bearing dolomite	9.66	0.16	1.45	2.6	8	115	68.2	18.85	79.3	14.55	3.36	18.3	2.61	16.4	199	3.64	10.1	1.22	6.41	0.88	557.82	0.33797	1.33668	54.6703
MTC-32	Phosphorite	33.4	0.19	5.1	2.6	27	377	220	63.2	271	47.9	10.95	57.4	7.92	47.9	570	10.25	26.7	3.22	14.8	1.93	1730.17	0.328846	1.1859	55.6098
MTC-33	P-bearing dolomite	7.75	0.18	1.12	2.1	5	89.1	52.2	14.93	63.5	11.6	2.71	13.85	1.96	12.45	155	2.84	7.74	0.96	4.86	0.65	434.35	0.330218	1.2728	54.5775
MTC-34	Phosphorite	36.8	0.2	4.49	1.6	23	393	226	64.8	277	48.2	10.93	57.6	7.81	49.3	575	10.5	27.2	3.21	15.2	2.03	1767.78	0.326756	1.21296	54.7619
MTC-35	Phosphorus dolomite	13	0.2	1.51	3.5	6	137	78.5	22.5	95.9	17.6	4.02	20.7	2.97	18.3	217	4.06	10.8	1.3	6.63	0.91	638.19	0.326225	1.23306	53.4483
MTC-36	Phosphorite	37	0.16	7.75	2.4	51	427	255	71.8	313	56.1	12.35	67.5	9.22	55.4	637	11.75	30.5	3.54	16.8	2.25	1969.21	0.336018	1.1711	54.2128
MTC-37	Phosphorus dolomite	15.75	0.27	1.82	3.3	8	147	87.3	25.1	108	20	4.7	23.7	3.23	19.75	243	4.41	11.65	1.4	6.96	0.93	707.13	0.331602	1.17107	55.102
MTC-38	Phosphorite	32	0.25	3.85	3.2	19	323	183.5	52.7	224	40.2	9.2	47.8	6.54	40.9	478	8.58	22.4	2.66	12.3	1.6	1453.38	0.32451	1.20655	55.711
MTC-39	Phosphorus dolomite	13.6	0.18	1.87	4.3	9	145.5	87.6	23.1	97.8	18.03	4.12	21.6	3.04	18.9	225	4.08	10.75	1.3	6.42	0.88	668.12	0.348631	1.24312	55.1471
MTC-40	Phosphorite	33	0.33	4	2.5	24	330	186.5	54	227	41.3	9.24	49	6.7	41.2	490	8.85	23	2.73	13.05	1.76	1484.33	0.322347	1.18303	55.3672
MTC-41	Phosphorus dolomite	18.05	0.38	2.46	3.1	14	173	100	28.2	121.3	22.4	5.27	27.2	3.75	23	269	4.9	12.5	1.55	7.4	0.99	800.46	0.330333	1.21766	54.898
MTC-42	Phosphorite	33.6	0.31	3.64	2.5	20	308	172	51.5	223	39.5	9.12	47.8	6.78	42.6	472	8.97	23.4	2.73	12.58	1.63	1421.61	0.3151	1.27897	52.6198
MTC-43	P-bearing dolomite	2.86	0.74	1.27	2.6	13	32.3	20.6	5.44	23.3	4.57	1.04	5.28	0.76	4.78	58.9	1.11	3.37	0.45	2.74	0.41	165.05	0.358563	1.24039	53.0631
MTC-44	Phosphorite	36.5	0.28	3.88	1.8	20	328	193.3	55.9	242	43.6	10.35	52.1	7.35	46.2	499	9.68	25.2	2.91	13.75	1.77	1531.11	0.329373	1.25662	51.5496
MTC-45	P-bearing dolomite	9.58	0.67	1.14	2.8	8	88.7	51.9	14.68	64.3	11.3	2.89	13.4	1.94	12.3	141.5	2.69	7.3	0.87	4.59	0.62	418.98	0.33185	1.29084	52.6022
MTC-46	Phosphorite	29.1	3.07	3.52	3.7	23	232	136	38.6	164.8	30	6.18	34.2	4.91	31.6	354	6.67	18.4	2.08	10.08	1.33	1070.85	0.331589	1.24915	53.0735
MTC-47	P-bearing dolomite	9.21	2.54	2.89	3.4	20	75.5	48.2	12.75	56	10.11	2.17	11.9	1.7	10.8	122.5	2.33	6.33	0.76	4.07	0.58	365.7	0.358441	1.26683	52.5751
MTC-48	Phosphorite	27	1.25	2.51	2.8	27	206	120.5	34.4	149.5	26.9	5.59	30.8	4.44	27.7	318	5.96	15.8	1.85	9	1.16	957.6	0.330273	1.22117	53.3557
MTC-49	Phosphorus dolomite	13.2	0.96	1.35	2.6	12	101.1	59.2	16.8	73.5	13.33	2.9	15.45	2.19	14	165	2.95	8.17	0.92	4.72	0.63	480.86	0.331429	1.2455	55.9322
MTC-50	Phosphorite	27.3	0.28	1.35	1	19	124	83.1	21.7	96.7	17.18	3.89	20.8	2.97	19.1	241	4.21	11.3	1.32	5.97	0.75	653.99	0.369623	1.31843	57.2447
MTC-51	Phosphorus dolomite	16	0.43	1.93	1.3	9	107.5	83	20.1	89.2	16.45	3.74	20.1	2.8	18.7	227	4.1	10.01	1.24	5.75	0.74	610.43	0.411979	1.3481	55.3659
MTC-52	Phosphorus dolomite	17.35	0.79	1.33	0.5	15	80.2	69.2	15.78	72.2	13.45	3.06	16.45	2.31	15.15	182	3.27	8.53	0.99	4.55	0.59	487.73	0.448812	1.33579	55.6575
